# Supplementary material for: Single-step exfoliation of black phosphorus and deposition of phosphorene via bipolar electrochemistry for capacitive energy storage application
Source: Royal Society of Chemistry journal article supplement (doi:10.1039/c9ta09641h), 2019-01-01
Supplement: c9ta09641h2.pdf [file c9ta09641h2.pdf]

## Supplementary Information

### Single-Step Exfoliation of Black Phosphorus and Deposition of Phosphorene via Bipolar Electrochemistry for Capacitive Energy Storage Application

Amin Rabiei Baboukani<sup>a</sup>, Iman Khakpour<sup>a</sup>, Vadym Drozd<sup>a,b</sup>, Anis Allagui<sup>c</sup>, and Chunlei Wang<sup>a,b\*</sup>

<sup>a</sup> Department of Mechanical and Materials Engineering, Florida International University, Miami, FL33174, USA

<sup>b</sup> Center for the Study of Matter at Extreme Conditions (CeSMEC), Florida International University, Miami, FL 33199, USA

<sup>c</sup> Department of Sustainable and Renewable Energy Engineering, University of Sharjah, Sharjah, UAE

\* Corresponding author (wangc@fiu.edu).

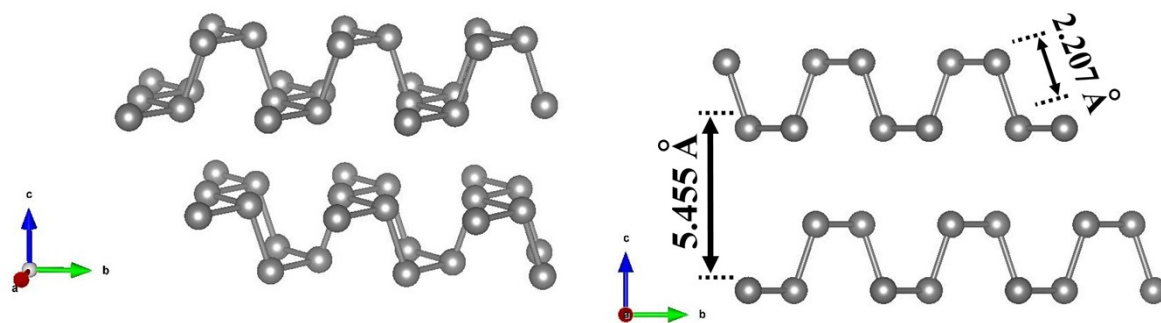

Figure 1S: Atomic structure of black phosphorus.

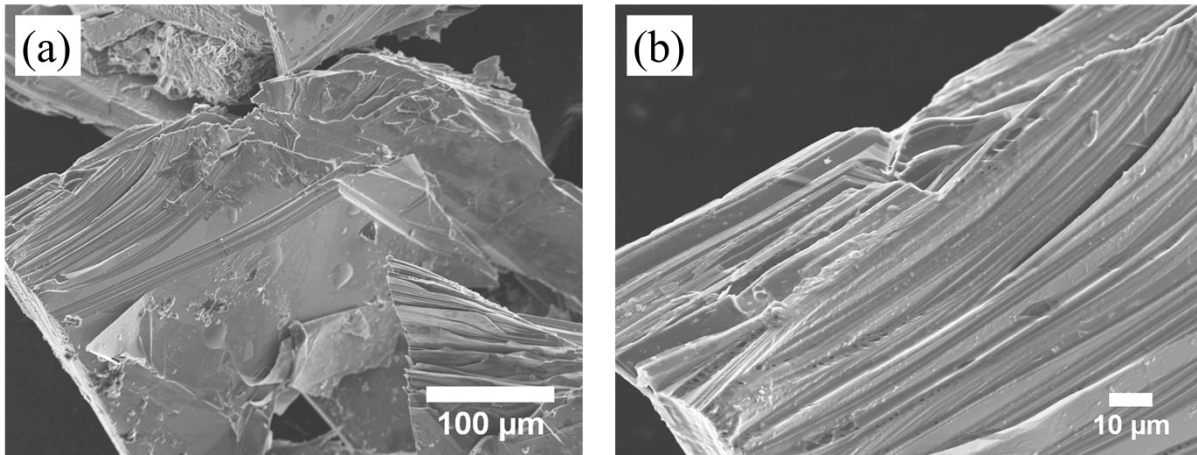

Figure 2S: FESEM images of bulk crystal of black phosphorus in different magnification.

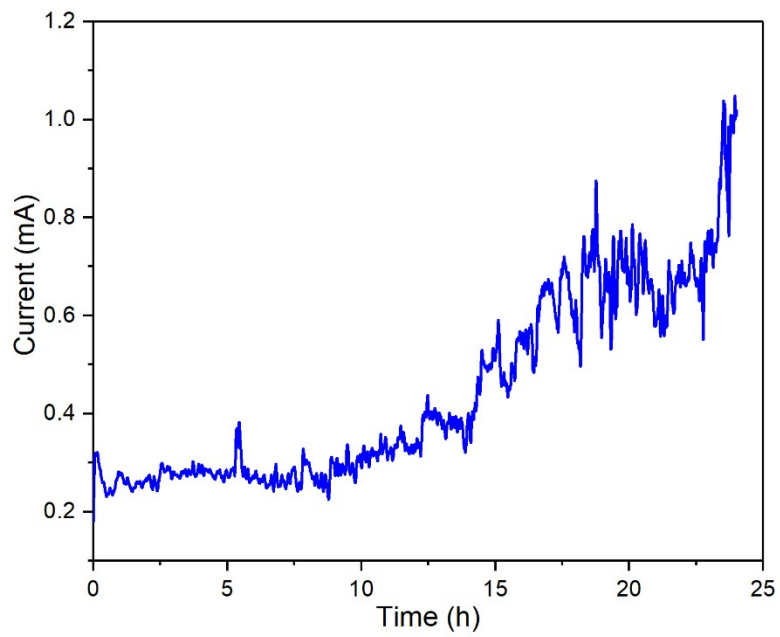

Figure 3S: Change of current vs. time during the bipolar exfoliation of bulk BP into phosphorene.

Table 1S: Summary of electrochemical performance of 2D materials for micro-supercapacitor application.

| Material                             | Experiment Parameter      | Power Density ( $\mu\text{W cm}^{-2}$ ) | Energy Density ( $\mu\text{Wh cm}^{-2}$ ) | Ref.      |
|--------------------------------------|---------------------------|-----------------------------------------|-------------------------------------------|-----------|
| Polyelectrolyte-wrapped Graphene/CNT | 100 $\mu\text{Acm}^{-2}$  | 20                                      | 3.84                                      | 1         |
| CNT/MnO <sub>2</sub> /Polymer Fiber  | 420 $\mu\text{Acm}^{-2}$  | 66.9                                    | 2.6                                       | 2         |
| Modified Graphene sheets             | 20 $\text{mAcm}^{-2}$     | 749.8                                   | 109.6                                     | 3         |
| Vertically aligned CNT               | 10                        | 1000                                    | 0.1                                       | 4         |
| Graphene-Ag-3D graphene foam         | 0.67 $\text{mAcm}^{-2}$   | 270                                     | 3.4                                       | 5         |
| 3D Graphene/graphite                 | 500 $\mu\text{Acm}^{-2}$  | 24.5                                    | 1.24                                      | 6         |
| 2D MnO <sub>2</sub>                  | 0.5 $\text{Acm}^{-2}$     | 639                                     | 9.0                                       | 7         |
| MXene/CNT                            | 2 $\mu\text{Acm}^{-2}$    | 2.4                                     | 0.05                                      | 8         |
| PANI/GO                              | 3 $\text{mAcm}^{-2}$      | 200                                     | 2.52                                      | 9         |
| MXene/CNF                            | 0.57 $\text{mAcm}^{-2}$   | 145                                     | 0.08                                      | 10        |
| Laser-assisted GO                    | 1100 $\mu\text{Acm}^{-2}$ | 1051                                    | 32.1                                      | 11        |
| Bipolar Exfoliated Phosphorene       | 500 $\mu\text{Acm}^{-2}$  | 351                                     | 0.01                                      | This Work |

## References

1. L. Kou, T. Huang, B. Zheng, Y. Han, X. Zhao, K. Gopalsamy, H. Sun and C. Gao, *Nature Communications*, 2014, **5**, 3754.
2. C. Choi, S. H. Kim, H. J. Sim, J. A. Lee, A. Y. Choi, Y. T. Kim, X. Lepró, G. M. Spinks, R. H. Baughman and S. J. Kim, *Scientific Reports*, 2015, **5**, 9387.
3. L. Gao, J. Song, J. U. Surjadi, K. Cao, Y. Han, D. Sun, X. Tao and Y. Lu, *ACS Applied Materials & Interfaces*, 2018, **10**, 28597-28607.
4. B. Hsia, J. Marschewski, S. Wang, J. B. In, C. Carraro, D. Poulikakos, C. P. Grigoropoulos and R. Maboudian, *Nanotechnology*, 2014, **25**, 055401.
5. L. Manjakkal, C. G. Núñez, W. Dang and R. Dahiya, *Nano Energy*, 2018, **51**, 604-612.
6. A. Ramadoss, K.-Y. Yoon, M.-J. Kwak, S.-I. Kim, S.-T. Ryu and J.-H. Jang, *Journal of Power Sources*, 2017, **337**, 159-165.
7. J. Qin, S. Wang, F. Zhou, P. Das, S. Zheng, C. Sun, X. Bao and Z.-S. Wu, *Energy Storage Materials*, 2019, **18**, 397-404.
8. C. Zhang, B. Anasori, A. Seral-Ascaso, S.-H. Park, N. McEvoy, A. Shmeliov, G. S. Duesberg, J. N. Coleman, Y. Gogotsi and V. Nicolosi, *Advanced Materials*, 2017, **29**, 1702678.
9. H. Wei, J. Zhu, S. Wu, S. Wei and Z. Guo, *Polymer*, 2013, **54**, 1820-1831.
10. W. Tian, A. VahidMohammadi, M. S. Reid, Z. Wang, L. Ouyang, J. Erlandsson, T. Pettersson, L. Wågberg, M. Beidaghi and M. M. Hamedi, *Advanced Materials*, **31**, 1902977.
11. J. Gao, C. Shao, S. Shao, C. Bai, U. R. Khalil, Y. Zhao, L. Jiang and L. Qu, *ACS Nano*, 2019, **13**, 7463-7470.
